# Supplementary material for: Coordinative and electrostatic forces in action: from the design of differential chromogenic anion sensors to selective carboxylate recognition
Source: Royal Society of Chemistry journal article supplement (doi:10.1039/b314997h), 2004-01-01
Supplement: b314997h.doc [file b314997h.doc]

**Chemical Communications**

**Coordinative and electrostatic forces in action: from the design of differential chromogenic anion sensors to selective carboxylate recognition**

Beatriz García-Acosta, Xavier Albiach-Martí, Eduardo García, Luis Gil, Ramón Martínez-Máñez,* Knut Rurack,* Félix Sancenón and Juan Soto

**Supporting Information**

**Synthesis of 1**: 10-phenyl-1,4-dioxa-7,13-dithia-10-aza-cyclopentadecane1 (800 mg, 2.45 mmols) and diphenylpyrylium perchlorate (1630 mg, 4.90 mmols) were dissolved in 20 ml of anhydrous dimethylformamide and heated at 150 ºC for three hours. After cooling to room temperature, 60 ml of diethyl ether were added and the reaction mixture was stirred overnight. A magenta oil was obtained and separated by decantation. This oil was dissolved in dry acetone and an excess of ammonium hydroxide was added. The crude product was then concentrated in a rotary evaporator and column-chromatographied over silica gel with dichloromethane-hexane (50:50) as eluent. Receptor **1** was obtained as yellow solid (613 mg, 1.10 mmols). Yield 45 %. *1H-NMR* (CDCl3):  = 2.77 (t, 4H, CH2), 2.94 (t, 4H, CH2), 3.62 (s, 2H, CH2), 3.70 (t, 4H, CH2), 3.82 (t, 4H, CH2), 6.76 (d, 2H, C6H4), 7.41 (t, 3H, C6H5), 7.50 (t, 3H, C6H5), 7.67 (d, 2H, C6H4), 7.82 (s, 2H, C6H2N), 8.18 (d, 4H, C6H5). *13C-NMR* (CDCl3):  = 29.47 (CH2), 31.24 (CH2), 51.88 (CH2), 70.73 (CH2), 74.37 (CH2), 112.04 (C6H5), 115.92 (C6H5), 126.00 (C6H5), 127.10 (C6H5), 128.20 (C6H5), 128.61 (C6H5), 128.78 (C6H5), 139.95 (C6H5), 147.59 (C6H5), 149.66 (C6H5), 157.30 (C6H5). *Mass spectra* (FAB): m/z 556 (M+). *Elemental analysis* (C, H, N) found C, 71.03; H, 6.48; N, 4.98 %. Calculated for C35H36N2O2S2 , C, 71.19; H, 6.52; N, 5.03 %.

**Interaction of 1 with metal cations:** The interaction of **1** with certain cations was studied by UV-Vis spectrophotometry. Receptor **1** consists of an anilino-type donor moiety attached through a single bond to a 2,6-diphenylpyridine acceptor group, exhibiting  electron delocalization over the entire chomophoric system. As a consequence, **1** shows an intramolecular charge transfer band, typical for such donor-acceptor-substituted dyes, centred at 340 nm in acetonitrile. Upon addition of different metal cations to **1** in acetonitrile, three different behaviours were observed (see Figure S1).

- The addition of the metal cations Fe3+, Cu2+, Zn2+ and Pb2+ induced the development of a new band at ca. 440 nm with the corresponding change of the solution from colourless to yellow. This bathochromic shift of the charge transfer band is conceivable with a coordination-induced increase in the acceptor strength of the pyridine unit and thus attributed to coordination of the metal ions to the pyridine group (see absorption spectra in the presence of Pb2+ in Figure S1).2

- The addition of one equivalent of Hg2+ to acetonitrile solutions of **1** induced a shift of the 340 nm band to 310 nm. This effect is attributed to Hg2+ coordination within the macrocyclic subunit. In this case, Hg2+ coordination induces a decrease of the donor character of the anilino nitrogen (the lone electron pair is engaged in coordination) with a subsequent hypsochromic shift of the charge-transfer band.

- Several other first row transition metal cations (such as Ni2+, see Figure S1) are unable to change the UV-Vis spectral profile of receptor **1** distinctly at micromolar concentrations, suggesting that no coordination takes place.

**Figure S1**. Absorption spectra of **1** in acetonitrile (*c***1** = 9.0 × 10–5 M) in the absence and presence of one equivalent of Pb2+, Hg2+ and Ni2+.

**Stability constants of selected metal ion complexes of 1:** The intensity of the 440 nm band of 9.0 × 10–5 M solutions of **1** in acetonitrile was monitored during a titration with increasing amounts of the metal ions Cu2+, Pb2+ or Zn2+, which allowed us to determine the complex stability constants. In these three cases, the formation of 1:1 ligand-to-metal complexes was found and the calculated log*K* values, through nonlinear least-squares fitting of the titration profiles, were 4.60 ± 0.20, 4.86 ± 0.08 and 4.50 ± 0.20 for the complexes **1**–**Cu**, **1**–**Pb** and **1**–**Zn** respectively.

**Stability constants of 1–Pb with acetate and benzoate anions:** Monitoring the changes in the band centred at 440 nm (acetonitrile solutions) of the complex **1**–**Pb** upon addition of the anions acetate or benzoate allowed us to determine the stability constants for the ternary species. Titration profiles of solutions of **1**–**Pb** with acetate and benzoate clearly indicated the formation of 1:1 adducts. The log*K* values for the formation of the species **1**–**Pb**–**AcO** and **1**–**Pb**–**BzO** calculated through nonlinear least-squares treatment of the titration curves were 6.40 ± 0.30 and 5.90 ± 0.30, respectively (see Figure S2).

**Figure S2**. Titration profile of **1**–**Pb** with the acetate anion (AcO–) in acetonitrile.

**Principal component analysis (PCA):** To test the ability of the system in terms of differential recognition of small monovalent anions, acetonitrile solutions of **1**–**M** chemosensors where prepared (1:1 metal-to-ligand ratios; M = Fe3+, Cu2+, Zn2+ and Pb2+) and mixed with aliquots of solutions containing one or two equivalents of the anions F–, Cl–, Br–, I–, NO3–, AcO– or SCN–. Simple visual inspection gave no well-defined selective color changes (except for the **1**–**Pb** system). Nevertheless, analyzing the possible existence of patterns in the spectral variations between the **1**–**M** sensors in the presence of anions, the difference in the absorption spectra (absorbances at 340, 410, 425, 440, 456, 472 nm were used) of **1**–**M** and the **1**–**M**–**X** ensemble of three trials were compared by using principal component analysis (PCA) algorithms. Principal component analysis (PCA) is a wide-spread pattern recognition tool used to find relations between different groups of data. The computer software *MATLABTM* and *PLS_Toolbox* were used for the data treatment process. Recognition patterns were identified for AcO–, F– and SCN– whereas the proximity between scores for Cl–, Br–, I– and NO3– indicate a too high similarity in color variation with the present family of **1**–**M** chemosensors.

**Time-resolved fluorescence measurements:** To avoid errors in the lifetime determination due to re-absorption effects, the time-resolved fluorescence measurements were carried out with all the components **1**, **M**, and **X** in 10-times lower concentration than used in the corresponding steady-state experiments. Moreover, to be able to excite the different species at various wavelengths in their longest-wavelength absorption bands between 300 and 500 nm, the setup described by us in an earlier publication3 was modified with respect to the excitation source.

For the present studies, the 80 fs pulses provided at 800 nm with a repition rate of 82 MHz by a frequency-doubled, diode-pumped Nd:YVO4 laser-pumped Ti:Sapphire laser (Spectra Physics Millennia Xs and Tsunami) were used to seed a regenerative amplifier (Spectra Physics Spitfire P-5K), where pulse amplification was obtained by pumping with a frequency-doubled, diode-pumped Nd:YLF laser (Spectra Physics Evolution X), operated at 5 kHz. The typically 90 fs long output pulses were fed into an OPA (Spectra Physics OPA-800-F-HGII) and used to generate the respective excitation light by frequency quadrupling the signal or idler of the OPA. The samples were placed in 10 mm quartz cuvettes, thermostated to ± 0.2 K at 299 K, and fluorescence was collected at right angles (polarizer set at 54.7°; subtractive doublemonochromator with spectral bandwidths of 4, 8, and 16 nm). The fluorescence decays were recorded with a modular single photon timing unit described in ref. 3, which was modified in such a way that the start as well as the stop signal leaving the constant fraction discriminator were directly fed into a Model 9308-PCI picosecond time analyzer (pTA) from Ortec, operated with Ortec’s pTA32 software. The pTA allows for a spreading of the time base over 64k channels with a time division of 1.22 ps channel–1, equaling a measurement window of 80 ns. While realizing typical instrumental response functions of 25 ps (full width at half maximum), the overall experimental accuracy amounts to  3 ps, respectively. The laser beam was attenuated using a double prism attenuator from LTB and typical excitation energies were in the nanowatt range (average laser power). Detection rates were adjusted to 200 counts s–1 to account for the comparatively low repetition rate of the regenerative amplifier. The excitation energies were checked and adjusted with a calibrated Si diode (Model 221 with 100:1 attenuator 2550, Graseby) and an optometer (Model S370, Graseby). Temporal calibration of the experimental setup was checked with pinacyanol in ethanol (*τ*f = 13 ps  1 ps),4 rose bengal in methanol (*τ*f = 0.50 ns  0.02 ns),5 and fluorescein 27 in 0.1 *N* NaOH (*τ*f = 4.50 ns  0.03 ns).6 For the estimation of the colour shift (wavelength dependent temporal response of the detection system) between the instrumental response function and the actual fluorescence decay, the fluorescence of 1,4-di[2-(5-phenyloxazolyl)]benzene (POPOP, in ethanol) and coumarin 153 (in ethanol) were quenched by saturation with potassium iodide and their decay profiles were recorded at the corresponding emission wavelengths.

The fluorescence lifetime profiles were analyzed with a PC using the software package Globals Unlimited V2.2 (Laboratory for Fluorescence Dynamics, University of Illinois). The goodness of the fit of the single decays as judged by reduced chi-squared (*χ*R2) and the autocorrelation function *C(j)* of the residuals was always below *χ*R2 < 1.2.

The long-term reproducibility of the instrumental setup is ≤  5 ps as checked routinely with several internal standard dyes of different decay kinetics and in different wavelengths ranges.

In all the measurements, no hints of an excited-state reaction i.e. the involvement of more than up to two independently emitting species (either **1** and/or **1**–**M** as well as **1**–**M** and/or **1**–**M**–**X** in experiments with varying concentrations of the species) were found.

**References:**

1.- A. B. Descalzo, R. Martínez-Máñez, R. Radeglia, K. Rurack and J. Soto, *J. Am. Chem. Soc.*, 2003, **125**, 3418.

2.- B. Valeur and I. Leray, *Coord. Chem. Rev.*, 2000, **205**, 3.

3.- U. Resch and K. Rurack, *Proc. SPIE-Int. Soc. Opt. Eng.*, 1997, **3105**, 96.

4.- N. Boens, N. Tamai, I. Yamazaki and T. Yamazaki, *Photochem. Photobiol.*, 1990, **52**, 911.

5.- D. F. Eaton, *Pure Appl. Chem.*, 1988, **60**, 1107.

6.- R. A. Velapoldi and M. S. Epstein, In *Luminescence Applications in Biological, Chemical, Environmental, and Hydrological Sciences*; M. C. Goldberg (Ed.); ACS Symp. Ser. Vol. 383, American Chemical Society: Washington, D. C., 1989; p. 98.
